# Supplementary material
Source: publisher site journal article supplement (https://www.spandidos-publications.com/5122/downloadSupplementary)
Supplement: Supplementary file 1 [file downloadSupplementary]

Table SI. Sequences of siRNA and shRNA

| Name              | Type  | Sources        | Target sequences (5'→3') |
|-------------------|-------|----------------|--------------------------|
| GABP $\alpha$     | siRNA | Ambion         | GCTAGAACTTCTTACTGATAA    |
| NRF1              | siRNA | Ambion         | CCACGTTAGATGAATATACTA    |
| Control           | siRNA | Ambion         | AGTCGTAAGGCTAAGCTGCTT    |
| PGC1 $\beta$      | shRNA | MilliporeSigma | CCCTCGAGGAATACCTCAATA    |
| NF $\kappa$ B-p65 | shRNA | MilliporeSigma | GCCTTAATAGTAGGGTAAGTT    |
| LMP1              | shRNA | MilliporeSigma | GCTACTGTTCTGGCTGTAT      |
| Control           | shRNA | MilliporeSigma | CAGTATCCGATTAGCCAGTTG    |

si-, small interfering; sh-, short hairpin.

Table SII. Sequences of primers for reverse transcription-quantitative PCR.

| Gene     | Species | Analysis | Primer sequence (5'→3')               |
|----------|---------|----------|---------------------------------------|
| LMP1     | EBV     | mRNA     | F: ccttctcctagccatcatcc               |
|          |         |          | R: ggtgttcatcagtgtgtcgtg              |
| β-actin  | Human   | Genome   | F: t <del>g</del> tagcctgtacatcctccca |
|          |         |          | R: ggtctgcagttgtacctgga               |
| BMRF1    | EBV     | Genome   | F: gg <del>t</del> tttacaggtctggcatca |
|          |         |          | R: acccggggacttttatcttct              |
| β-actin  | Human   | mRNA     | F: gatgcagaaggagatcactgc              |
|          |         |          | R: atactcctgcttgcctgatcca             |
| PGC1β    | Human   | mRNA     | F: gacgctctatcatgcacctca              |
|          |         |          | R: tgatgttggtaggatgtggc               |
| NFκB-p65 | Human   | mRNA     | F: atcccatctttgacaatcgtg              |
|          |         |          | R: gtcccgtgaatacacctcaa               |
| GABPα    | Human   | mRNA     | F: tttcttgggttgatgaag                 |
|          |         |          | R: tacaatcatgtcccacgt                 |
| NRF1     | Human   | mRNA     | F: cgaggacacctcttacgatga              |
|          |         |          | R: tcaatacatgaggccgttc                |
| DRP1     | Human   | mRNA     | F: agacaaggttgcctctggagg              |
|          |         |          | R: t <del>g</del> tggactggctggcataatt |
| OPA1     | Human   | mRNA     | F: aggaaagctcttccaatgaa               |
|          |         |          | R: tgccttagcatgcttgtctt               |
| MFN2     | Human   | mRNA     | F: atcaatggcattttgagcag               |
|          |         |          | R: actgatgcctctcactttgga              |
| PGC1β    | Human   | ChIP     | F: cagaagaagcaggtgtctcg               |
|          |         |          | R: cctcagcaaggggtaaagc                |
| DRP1     | Human   | ChIP     | F: aatttacggccttctctctgc              |
|          |         |          | R: gttgtagttctggagcggagg              |
